# Supplementary material for: Establishment of an in vitro model for analyzing mitochondrial ultrastructure in PRKN-mutated patient iPSC-derived dopaminergic neurons
Source: PubMed Central journal article supplement (PMC7986497; doi:10.1186/s13041-021-00771-0), 2021-03-23

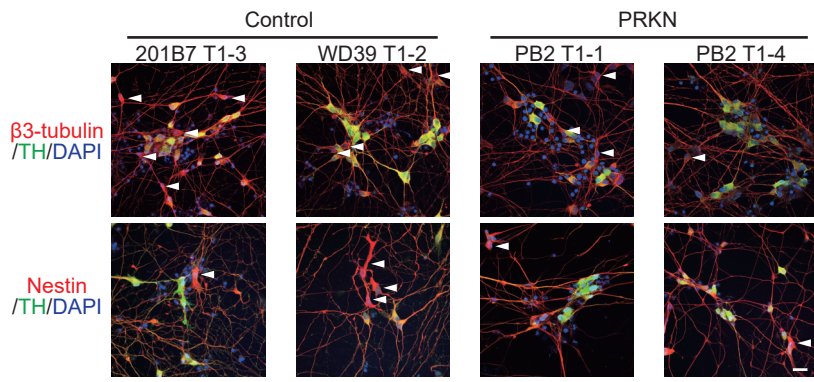

Supplement: 13041_2021_771_MOESM2_ESM.pdf [file 13041_2021_771_MOESM2_ESM.pdf]
